# Supplementary material for: Quasiparticle energies, exciton level structures and optical absorption spectra of ultra-narrow ZSiCNRs
Source: Royal Society of Chemistry journal article supplement (doi:10.1039/c7ra09993b), 2017-01-01
Supplement: c7ra09993b1.pdf [file c7ra09993b1.pdf]

Electronic Supporting Information  
for

Quasiparticle Energies, Exciton Level Structure and Optical Absorption Spectra of  
Ultra-narrow ZSiCNRs

Ping Lou

*Department of Physics, Anhui University, Hefei 230039, Anhui, China*

Table of Contents

|                     |             |
|---------------------|-------------|
| 1. Figure S1 .....  | Page ESI-2  |
| 2. Figure S2 .....  | Page ESI-3  |
| 3. Table.I .....    | Page ESI-4  |
| 4. Table.II .....   | Page ESI-4  |
| 5. Table.III .....  | Page ESI-4  |
| 6. Figure S3 .....  | Page ESI-5  |
| 7. Figure S4 .....  | Page ESI-6  |
| 8. Figure S5 .....  | Page ESI-7  |
| 9. Figure S6 .....  | Page ESI-8  |
| 10. Figure S7 ..... | Page ESI-9  |
| 11. Figure S8 ..... | Page ESI-10 |

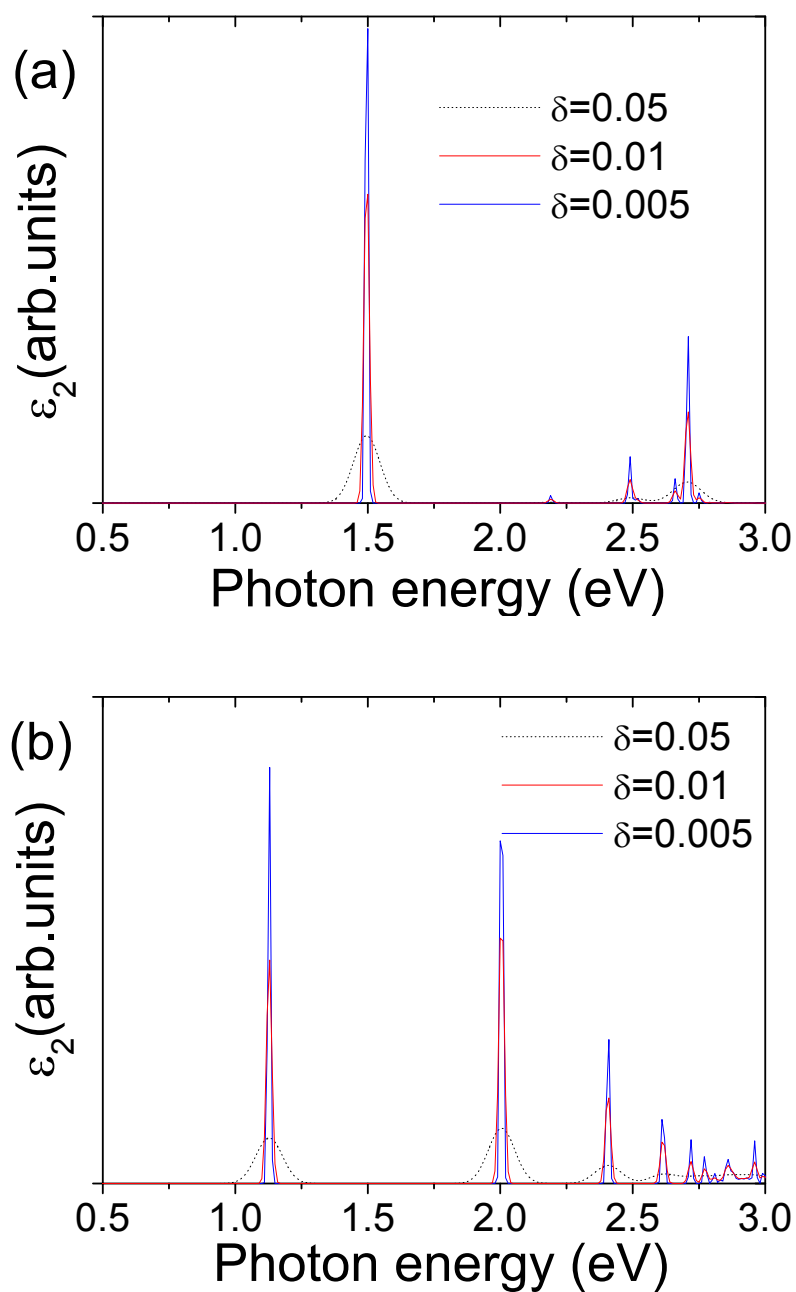

FIG. S1: (color online) (a) the longitudinal optical absorption spectra of 2-ZSiCNR including the effect of the electron-hole (e-h) interaction, (b) the transverse optical absorption spectra of 2-ZSiCNR including the effect of the electron-hole (e-h) interaction. Where different Gaussian broadening  $\delta$  have been used.

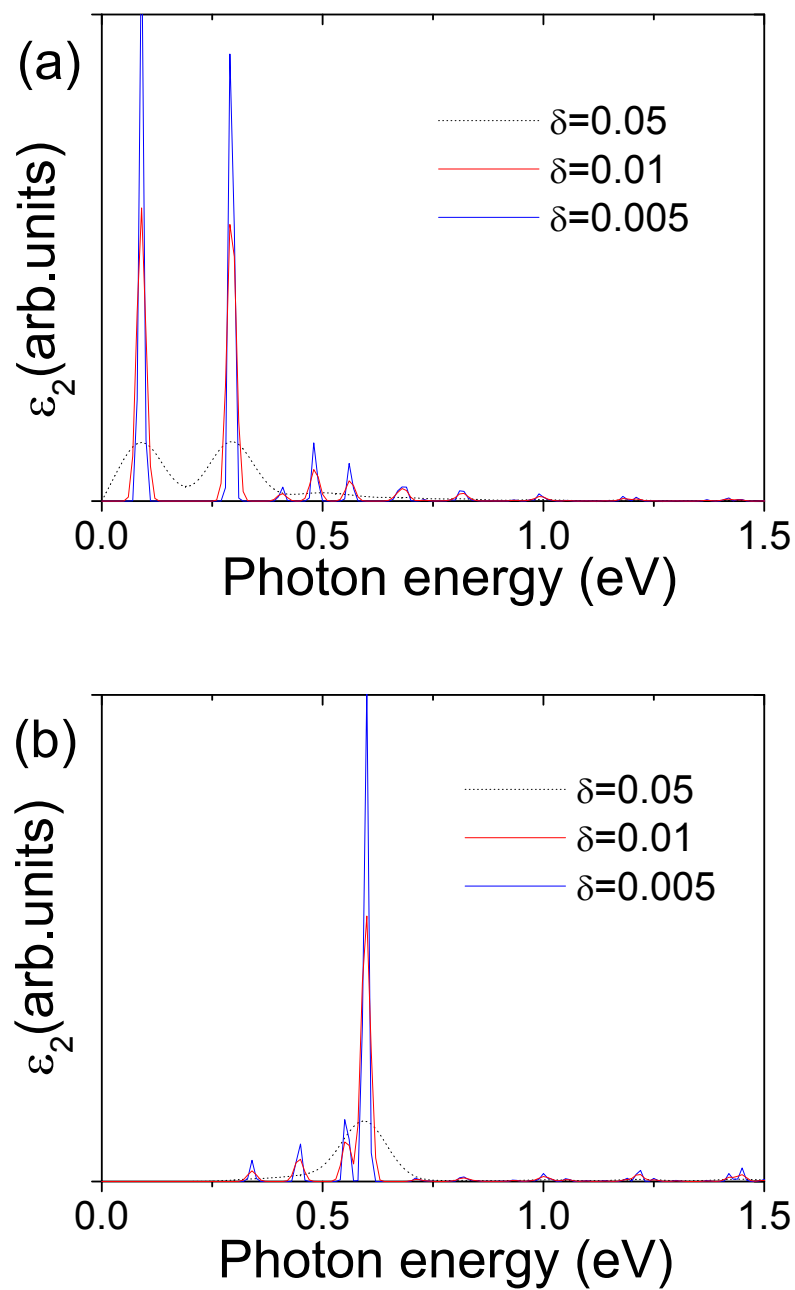

FIG. S2: (color online) (a) the longitudinal optical absorption spectra of 3-ZSiCNR including the effect of the electron-hole (e-h) interaction, (b) the transverse optical absorption spectra of 3-ZSiCNR including the effect of the electron-hole (e-h) interaction. Where different Gaussian broadening  $\delta$  have been used.

TABLE I: Special analysis for exciton wave functions of the degeneracy energy levels of 2-ZSiCNR associated with the interband transitions  $E^{ij}$ .

| $E^{ij}$ | $n$ -exciton | Energy (eV) | Weight  | Transition point |
|----------|--------------|-------------|---------|------------------|
| $E^{11}$ | 6            | 2.489       | 0.42837 | $Z$              |
| $E^{21}$ | 1            | 2.489       | 0.53292 | $Z$              |
| $E^{11}$ | 10           | 2.708       | 0.21162 | $Z$              |
| $E^{12}$ | 1            | 2.708       | 0.69132 | $Z$              |

TABLE II: Special analysis for exciton wave functions of the degeneracy energy levels of 3-ZSiCNR associated with the interband transitions  $E^{ij}$ .

| $E^{ij}$ | $n$ -exciton | Energy (eV) | Weight   | Transition point |
|----------|--------------|-------------|----------|------------------|
| $E^{11}$ | 75           | 1.814       | 0.62481  | non- $Z$         |
| $E^{21}$ | 1            | 1.814       | 0.34912  | $Z$              |
| $E^{11}$ | 82           | 1.936       | 0.12358  | non- $Z$         |
| $E^{21}$ | 2            | 1.936       | 0.81733  | $Z$              |
| $E^{11}$ | 88           | 2.054       | 0.13026  | non- $Z$         |
| $E^{21}$ | 3            | 2.054       | 0.86282  | $Z$              |
| $E^{11}$ | 90           | 2.107       | 0.38683  | non- $Z$         |
| $E^{21}$ | 4            | 2.107       | 0.567292 | $Z$              |
| $E^{11}$ | 96           | 2.176       | 0.02024  | non- $Z$         |
| $E^{21}$ | 5            | 2.176       | 0.97640  | $Z$              |
| $E^{11}$ | 100          | 2.220       | 0.01141  | non- $Z$         |
| $E^{21}$ | 6            | 2.220       | 0.97691  | $Z$              |
| $E^{11}$ | 102          | 2.258       | 0.00156  | non- $Z$         |
| $E^{21}$ | 7            | 2.258       | 0.99704  | $Z$              |
| $E^{11}$ | 107          | 2.312       | 0.01603  | non- $Z$         |
| $E^{21}$ | 8            | 2.312       | 0.97002  | $Z$              |

TABLE III: Convergence of band gap energies  $E_g$  calculated by  $GW$  of  $N$ -SiCNRs with respect to the  $k$ -grid.

| $k$ | 2-SiCNR  | 3-SiCNR  |
|-----|----------|----------|
| 16  | 2.818 eV | 0.949 eV |
| 32  | 2.909 eV | 0.869 eV |
| 64  | 2.911 eV | 0.804 eV |

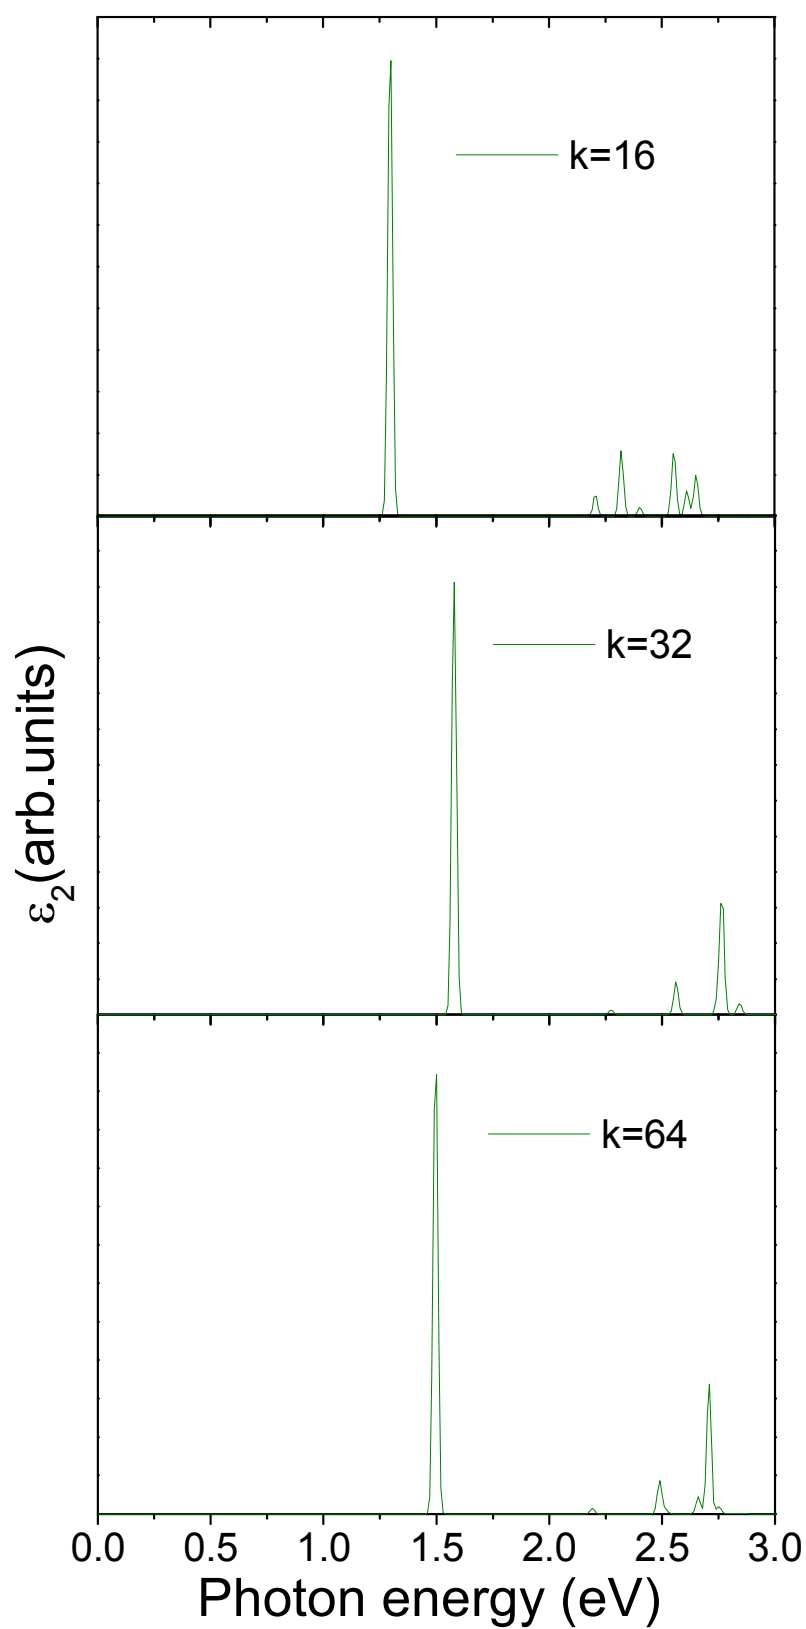

FIG. S3: (color online) Convergence of the optical absorption spectrum with respect to the k-grid. The longitudinal optical absorption spectra of 2-ZSiCNR including the effect of the electron-hole (e-h) interaction. A Gaussian broadening of 0.01 eV has been used.

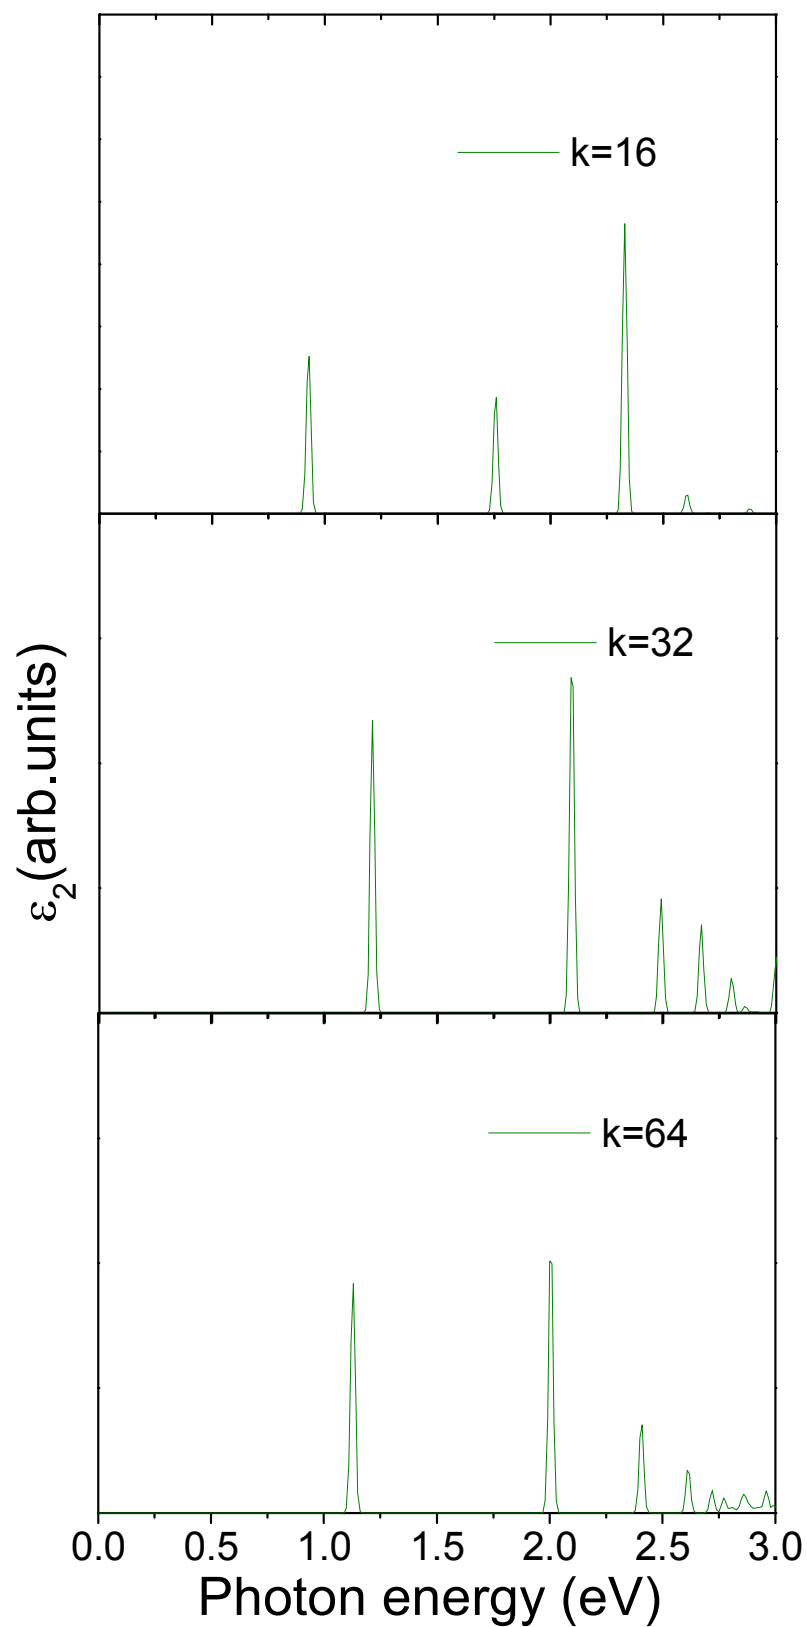

FIG. S4: (color online) Convergence of the optical absorption spectrum with respect to the k-grid. The transverse optical absorption spectra of 2-ZSiCNR including the effect of the electron-hole (e-h) interaction. A Gaussian broadening of 0.01 eV has been used.

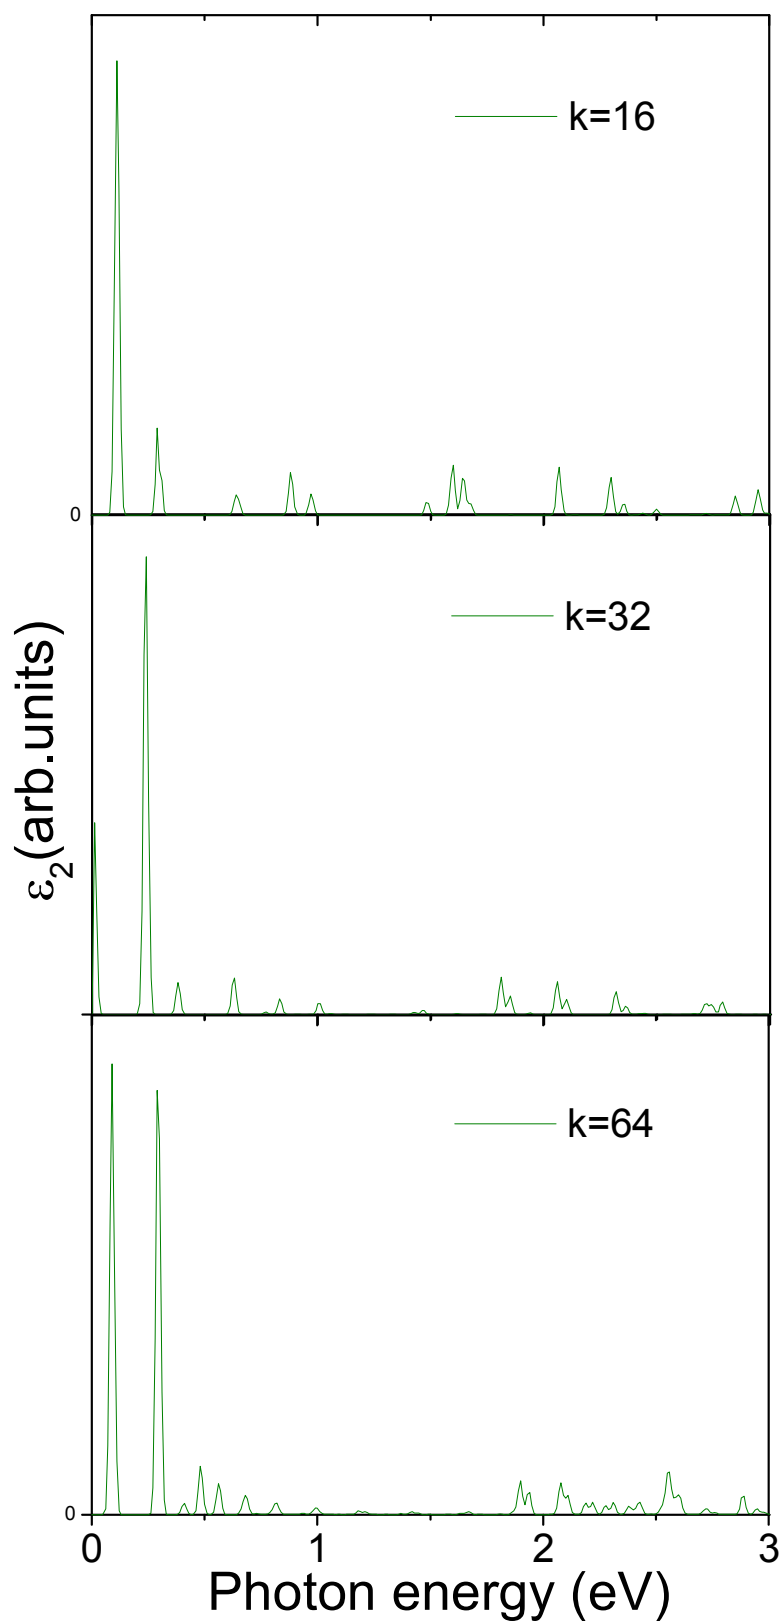

FIG. S5: (color online) Convergence of the optical absorption spectrum with respect to the k-grid. The longitudinal optical absorption spectra of 3-ZSiCNR including the effect of the electron-hole (e-h) interaction. A Gaussian broadening of 0.01 eV has been used.

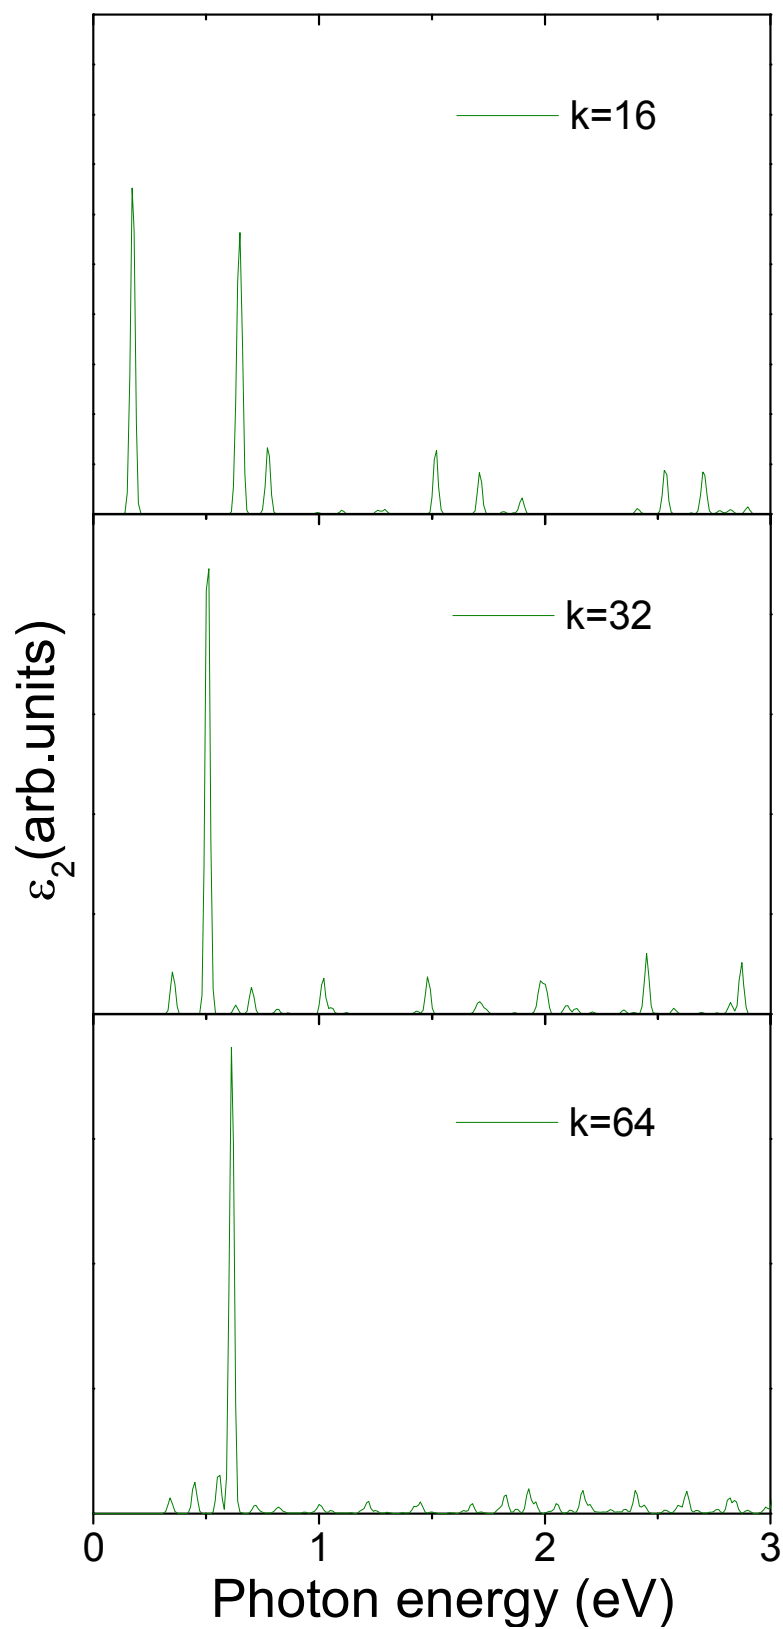

FIG. S6: (color online) Convergence of the optical absorption spectrum with respect to the k-grid. The transverse optical absorption spectra of 3-ZSiCNR including the effect of the electron-hole (e-h) interaction. A Gaussian broadening of 0.01 eV has been used.

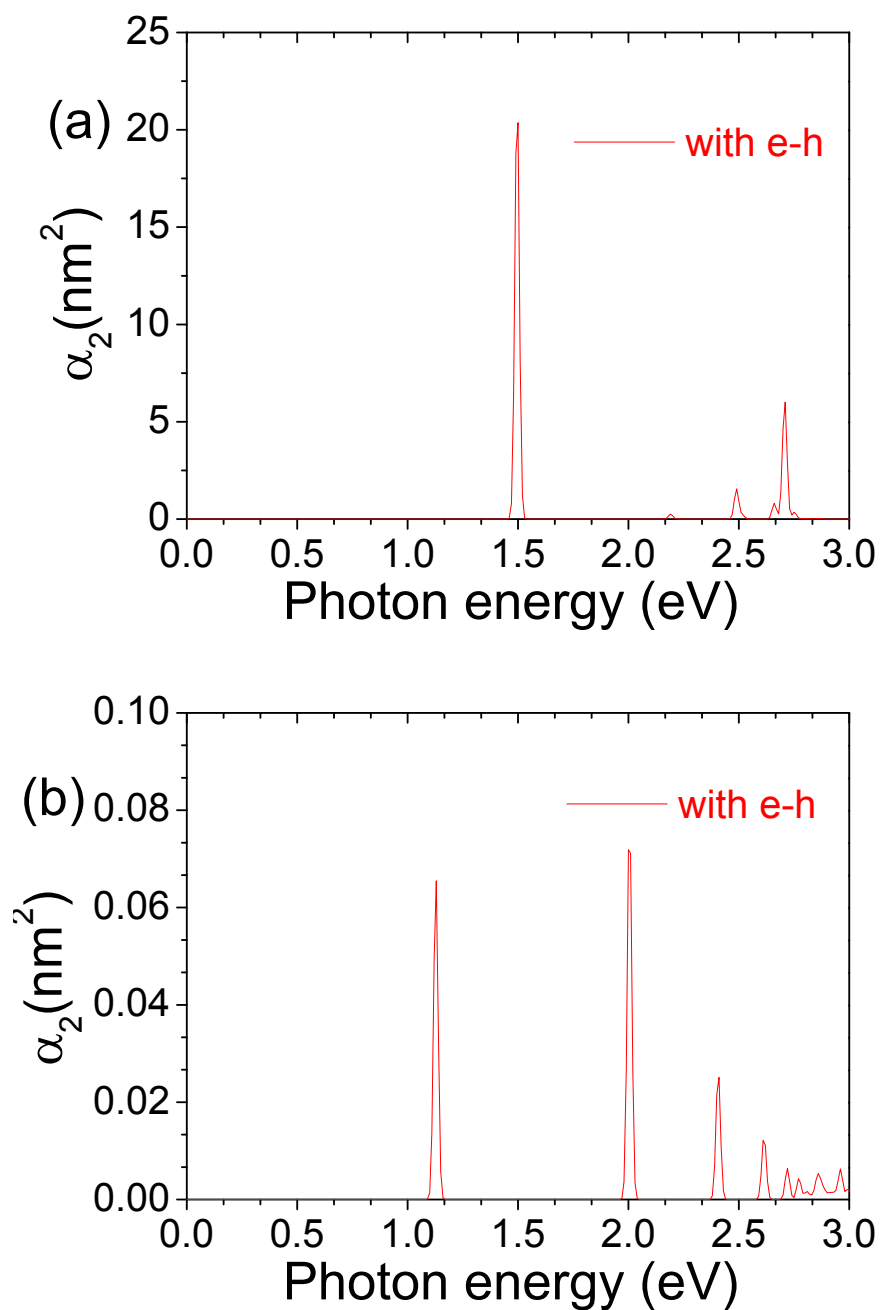

FIG. S7: (color online) The optical spectra in the polarizability per unit area: (a) the longitudinal optical absorption spectra of 2-ZSiCNR including the effect of the electron-hole (e-h) interaction, (b) the transverse optical absorption spectra of 2-ZSiCNR including the effect of the electron-hole (e-h) interaction. Where different Gaussian broadening  $\delta$  have been used.

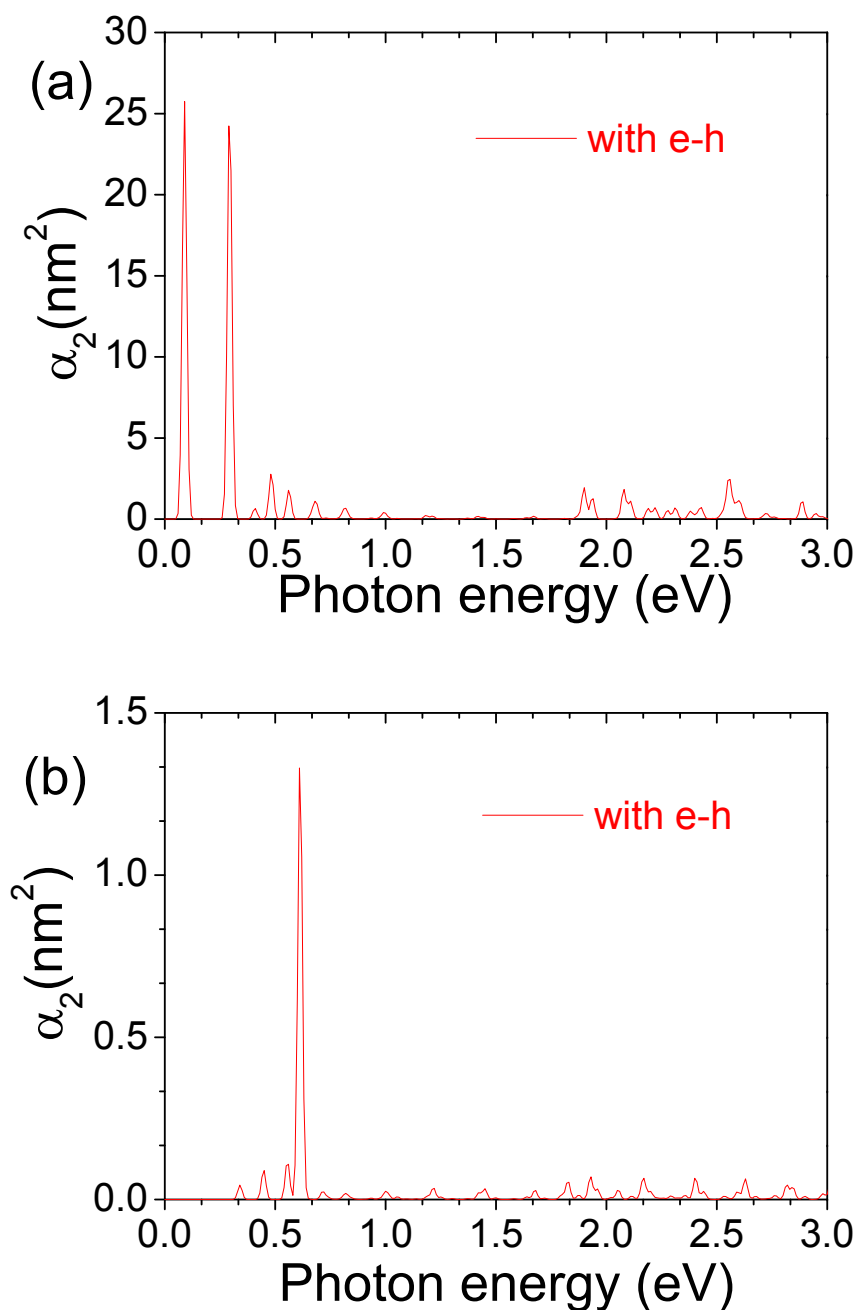

FIG. S8: (color online) The optical spectra in the polarizability per unit area: (a) the longitudinal optical absorption spectra of 3-ZSiCNR including the effect of the electron-hole (e-h) interaction, (b) the transverse optical absorption spectra of 3-ZSiCNR including the effect of the electron-hole (e-h) interaction. A Gaussian broadening of 0.01 eV has been used.
